# Supplementary material for: Modification of a disposable pencil graphite electrode with multiwalled carbon nanotubes: application to electrochemical determination of diclofenac sodium in some pharmaceutical and biological samples
Source: Royal Society of Chemistry journal article supplement (doi:10.1039/c6ay00441e), 2016-01-01
Supplement: c6ay00441e1.pdf [file c6ay00441e1.pdf]

## Supplementary Data for

### **“Modification of disposal pencil graphite electrode with multiwalled carbon nanotubes: Application to electrochemical determination of diclofenac sodium in some pharmaceutical and biological samples”**

Golnaz Parvizi Fard<sup>a,b</sup>, Esmaeel Alipour<sup>a,\*</sup> and Reza Emam Ali Sabzi<sup>b</sup>

<sup>a</sup> Electroanalytical Chemistry Laboratory, Department of Analytical Chemistry, Faculty of Chemistry, University of Tabriz, Tabriz, Iran

<sup>b</sup> Department of Analytical Chemistry, Faculty of Chemistry, Urmia University, Urmia, Iran

\*Corresponding author

E-mail: [i-alipour@tabrizu.ac.ir](mailto:i-alipour@tabrizu.ac.ir), Fax: +98 413 3340191

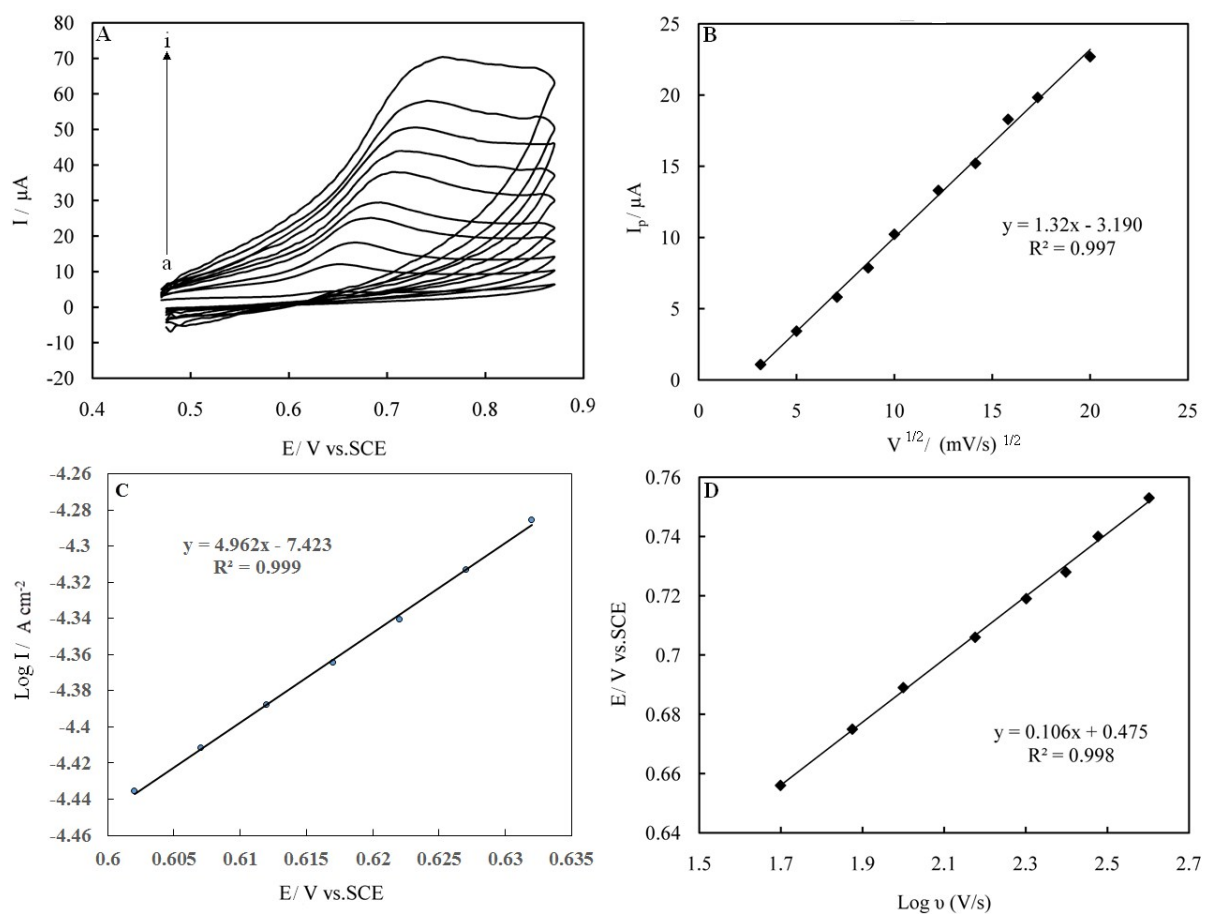

**Fig. S1** (A) Cyclic voltammograms of MWCNTs/PGE in 0.5 M acetate buffer solution (pH= 4) containing 0.57 mM DIC and 0.1 M NaCl as background electrolyte at different scan rates from (a) 10, (b) 25, (c) 50, (d) 100, (e) 150, (f) 200, (g) 250, (h) 300, (i) 350, and (j) 400  $\text{mV s}^{-1}$ , (B) Plots of anodic peak currents versus the square root of scan rate, (C) Plot of  $\log I$  versus potential (tafel plot) for 0.038 mM DIC and 0.1 M NaCl as background electrolyte on MWCNTs/PGE, and (D) Plot of  $E$  versus  $\log v$  (tafel plot) for 0.038 mM DIC and 0.1 M NaCl as background electrolyte on MWCNTs/PGE.

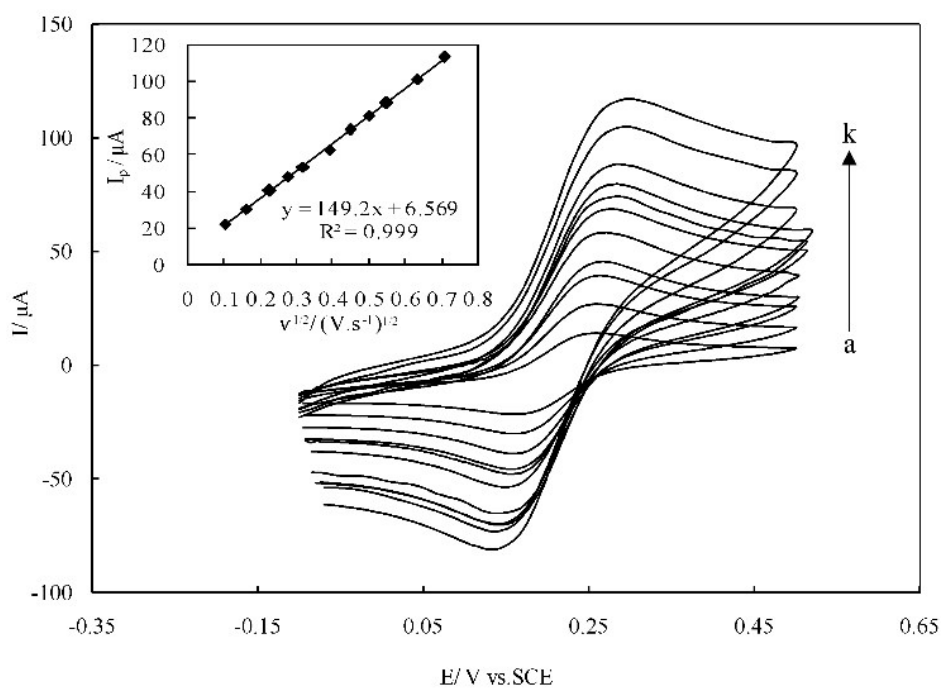

**Fig. S2** Cyclic voltammograms of MWCNTs/PGE in solution containing 1 mM  $\text{Fe}(\text{CN})_6^{3-/4-}$  and 1 M KCl with potential sweep rates of 10-400  $\text{mV s}^{-1}$ . Inset: Plot of peak current variation versus square root of potential sweep rates.

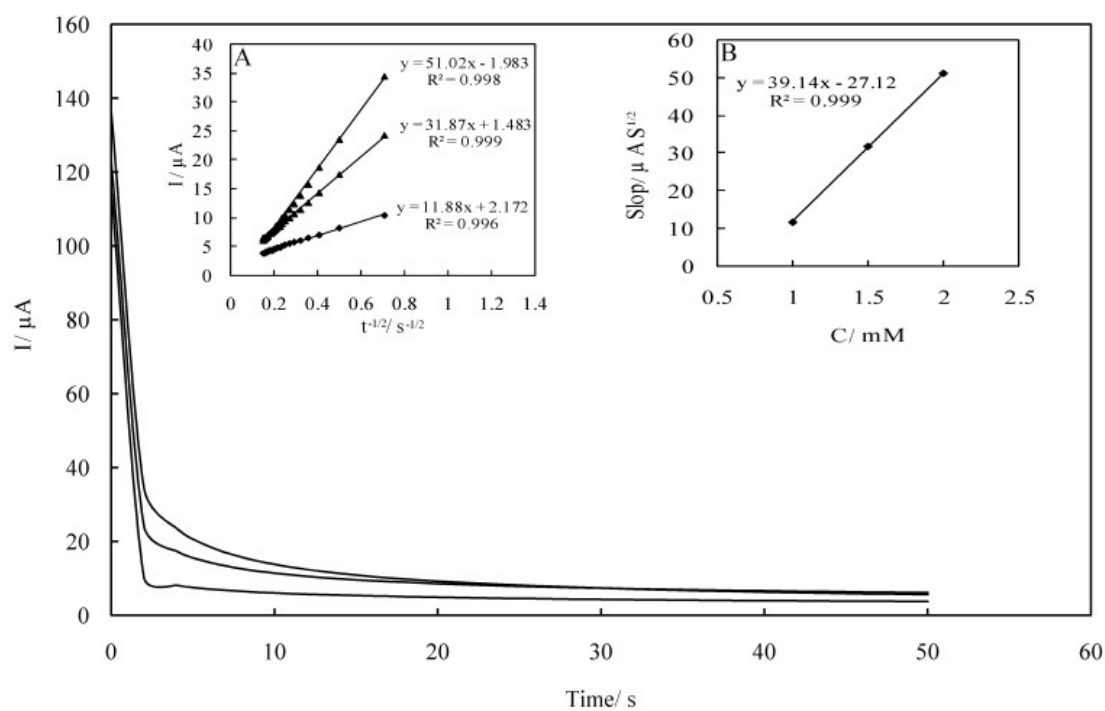

**Fig. S3** Chronoamperograms of (a) 1, (b) 1.5, and (c) 2 mM DIC in 0.5 M acetate buffer solution containing 0.1 M NaCl on MWCNTs/PGE. Inset A: Plot of currents versus square root of  $t$ . Inset B: Variation of slope of  $(I-t^{0.5})$  curves versus DIC concentrations.
